# Supplementary material for: Analysis of ancestry heterozygosity suggests that hybrid incompatibilities in threespine stickleback are environment dependent
Source: PubMed Central journal article supplement (PMC8746713; doi:10.1371/journal.pbio.3001469), 2022-01-10

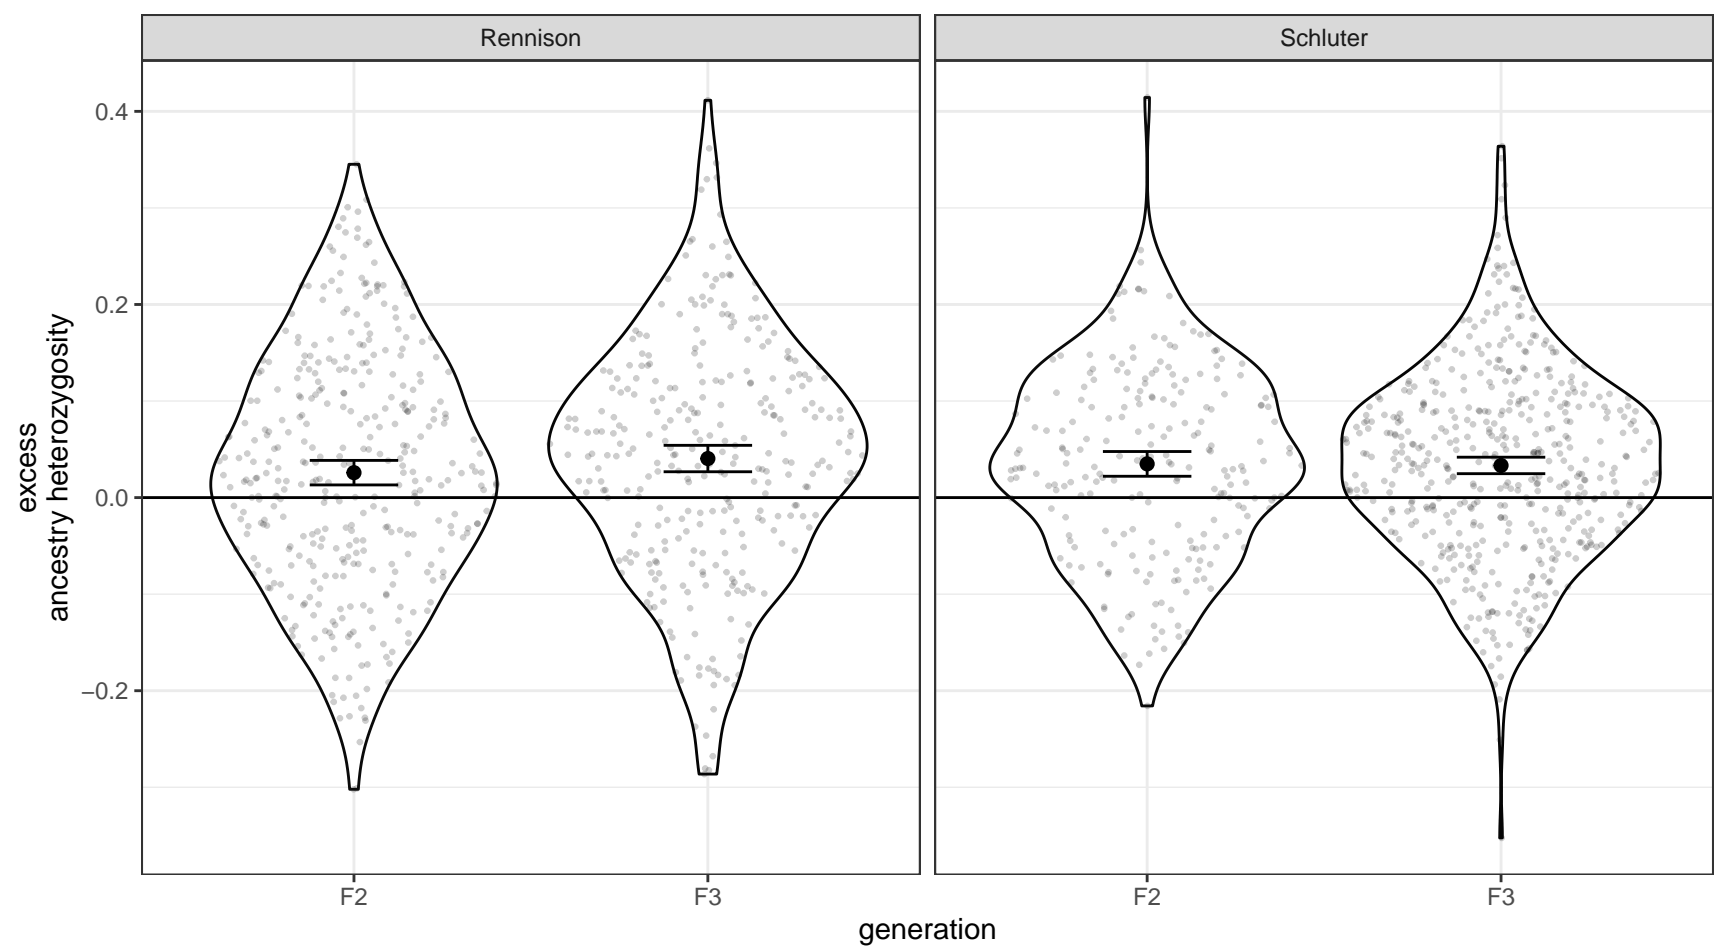

Supplement: pbio.3001469.s008.pdf [file pbio.3001469.s008.pdf]
